# Supplementary material for: Si@SbN: a promising solar photocatalyst for the reduction of NO
Source: Royal Society of Chemistry journal article supplement (doi:10.1039/d4cp02303j), 2024-01-01
Supplement: d4cp02303j1.pdf [file d4cp02303j1.pdf]

## Supporting Information

*for*

### **Si@SbN: A promising solar photocatalyst for the reduction of NO**

Lei Yang, Jiake Fan, Weihua Zhu\*

*Institute for Computation in Molecular and Materials Science, School of Chemistry and Chemical Engineering, Nanjing University of Science and Technology, Nanjing 210094, China*

---

\* Corresponding authors. E-mail: [zhuwh@njust.edu.cn](mailto:zhuwh@njust.edu.cn) (Weihua Zhu).

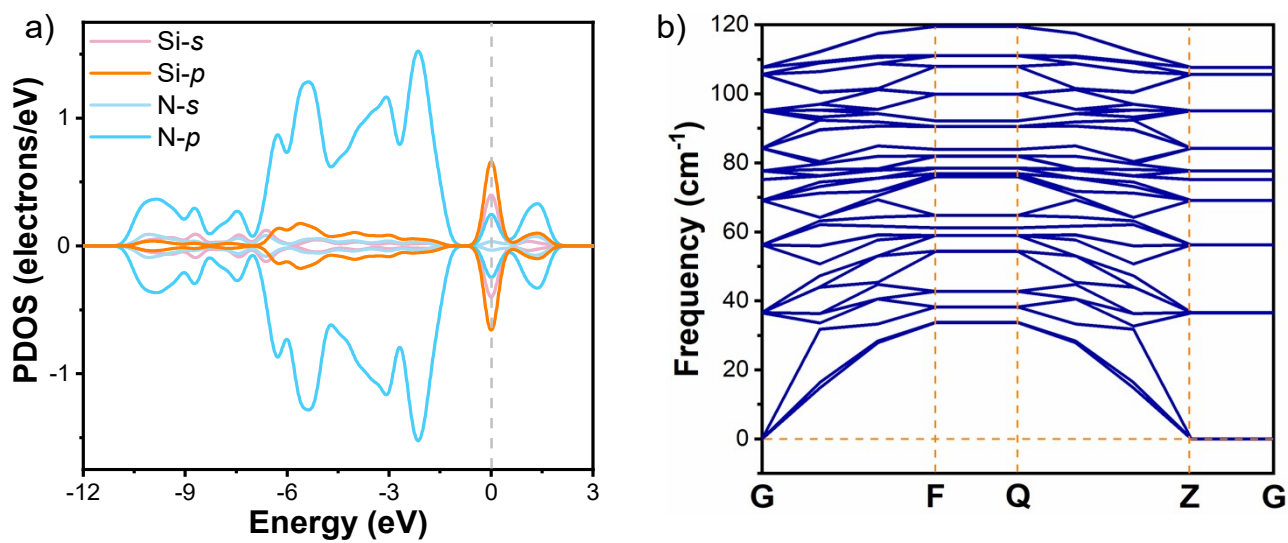

**Figure S1.** (a) Partial density of states (PDOS) of Si@SbN, including the N-*s*, Si-*s*, N-*p* and Si-*p* orbitals. (b) Phonon dispersion curve of geometrically optimized Si@SbN.

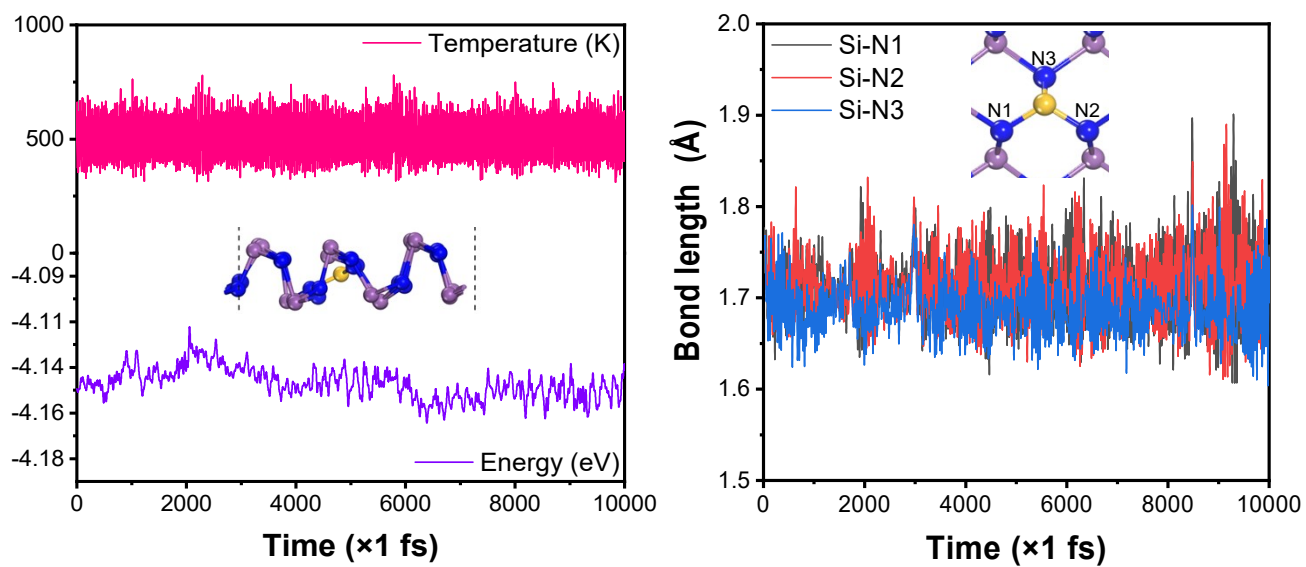

**Figure S2.** Variations of temperature, energy, and Si-N bond length fluctuations versus the AIMD simulation time for Si@SbN. The simulation is run under 500 K for 10 ps with a time step of 1 fs.

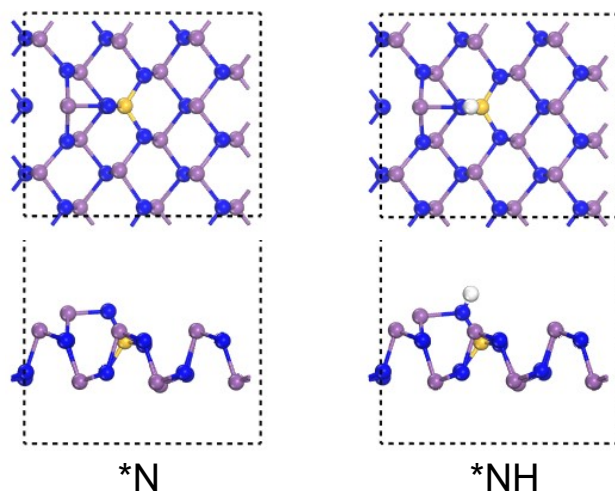

**Figure S3.** Optimized atomic configuration of \*N and \*NH.

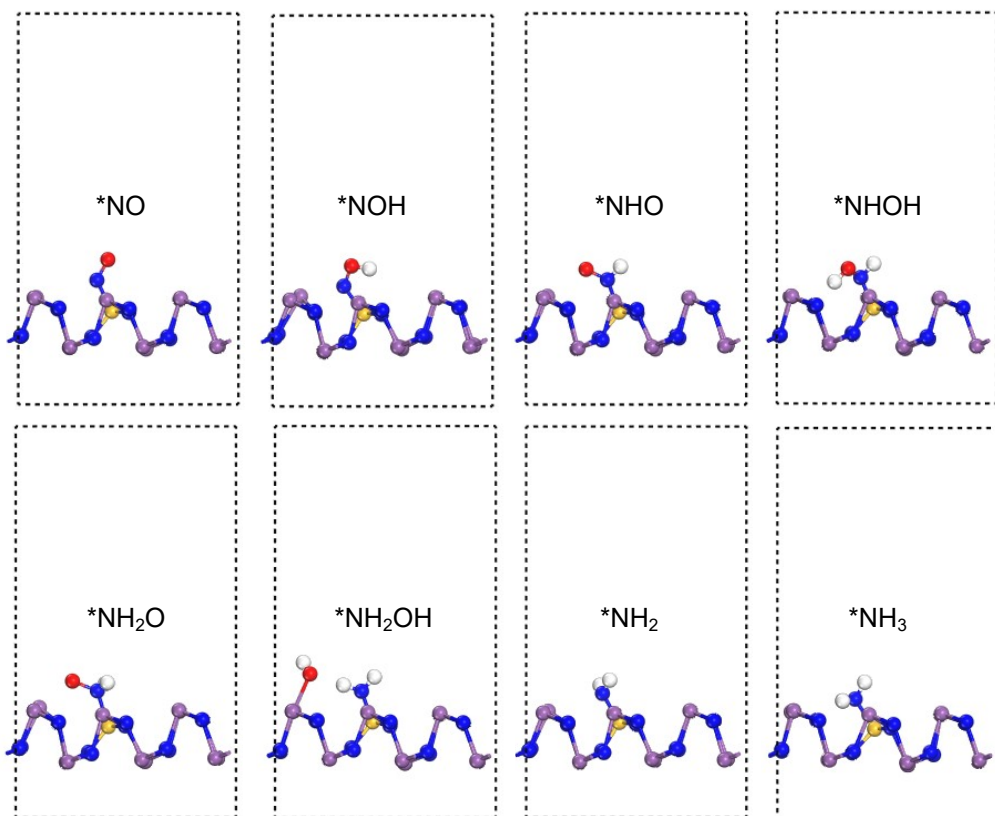

**Figure S4.** Optimized geometric of various intermediates along the different reaction pathways of NORR preceded on Si@SbN.

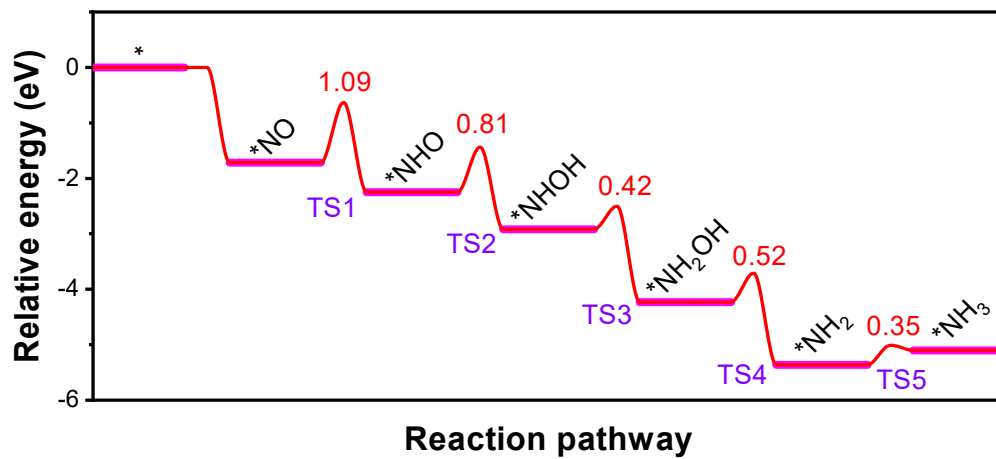

**Figure S5.** Energy barriers of each NORR step.

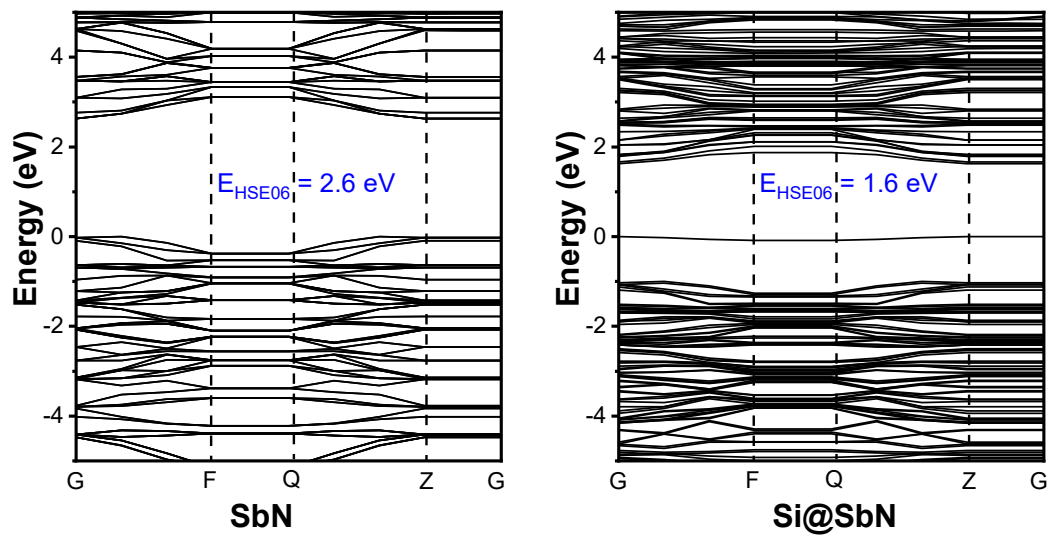

**Figure S6.** Band structures of (a) SbN and (b) Si@SbN.

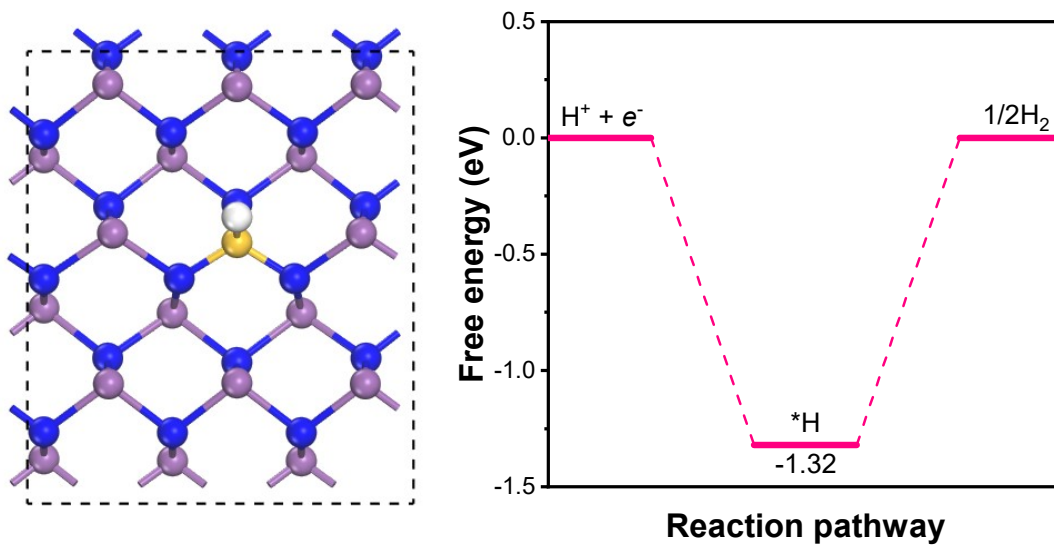

**Figure S7.** Optimized structure of \*H adsorbed on Si@SbN and the corresponding free energy diagram of HER.



**Table S1.** Test of supercell size and doping concentration.

| Supercell size                    | $2 \times 2 \times 1$ | $3 \times 3 \times 1$ | $4 \times 4 \times 1$ |
|-----------------------------------|-----------------------|-----------------------|-----------------------|
| $E_{\text{ads}}(*\text{NO})$ (eV) | -1.89                 | -1.80                 | -1.78                 |
| Doping concentration              | 25.00%                | 11.11%                | 6.25%                 |

**Table S2.** Formation energy ( $E_f$ , eV) of Si@SbN.

| $E_{\text{catalyst}}$ | $E_{\text{pure}}$ | $E_{\text{Si}}$ | $E_{\text{Sb}}$ | $E_f$ |
|-----------------------|-------------------|-----------------|-----------------|-------|
| -99817.82             | -95774.67         | -7874.95        | -3833.42        | -1.62 |

\*Formation energy ( $E_f$ ),  $E_f = E_{\text{catalyst}} - E_{\text{pure}} - E_{\text{Si}} + E_{\text{Sb}}$  where  $E_{\text{catalyst}}$ ,  $E_{\text{pure}}$ ,  $E_{\text{Si}}$  and  $E_{\text{Sb}}$  represent the DFT energy of Si@SbN catalyst, the DFT energy of pure SbN, the DFT energy of a Si atom in corresponding bulk, and the DFT energy of a Sb atom in corresponding bulk, respectively.
